# Supplementary material for: Effective Carbon/TiO2 Gel for Enhanced Adsorption and Demonstrable Visible Light Driven Photocatalytic Performance
Source: MDPI journal article supplement (doi:10.3390/gels8040215), 2022-04-01
Supplement: s1 [file s1]

# Effective carbon/TiO<sub>2</sub> gel for enhanced adsorption and demonstrable visible light driven photocatalytic performance

Anam Safri and Ashleigh Fletcher\*

## Supporting Information

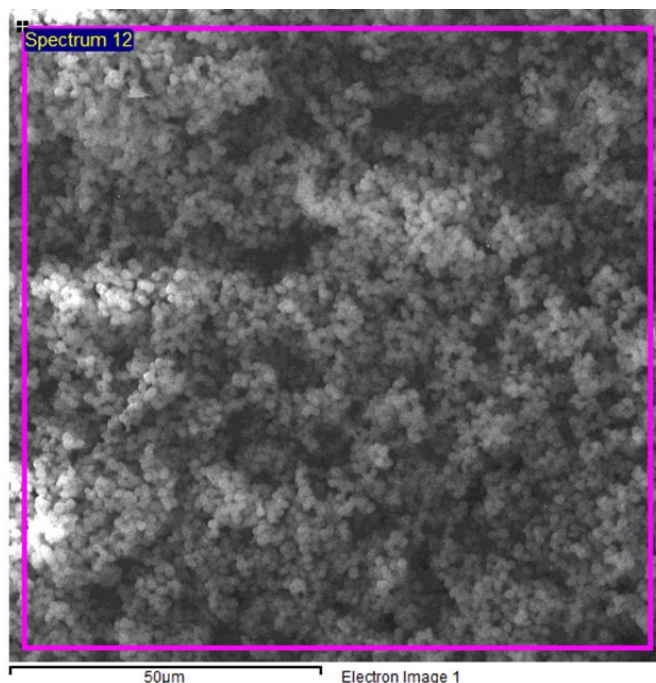

**Figure S1:** Zone of Energy dispersive x-ray (EDX) spectra

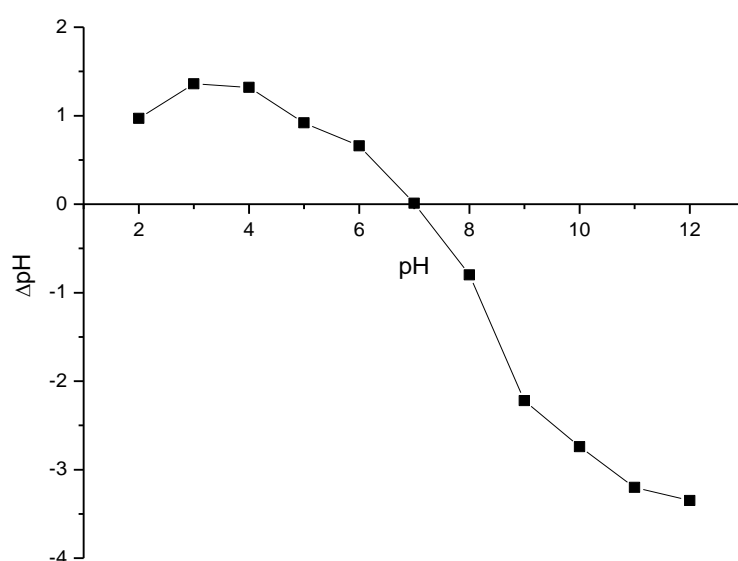

**Figure S2:** Point of zero charge (pHpzc) on the surface of RF/TiO<sub>2</sub>

**Table S1.** Kinetic parameters obtained by fitting kinetic data for MB adsorption to RF/TiO<sub>2</sub>.

| Model                                                                     | 50 mg L <sup>-1</sup> | 100 mg L <sup>-1</sup> | 150 mg L <sup>-1</sup> | 200 mg L <sup>-1</sup> |
|---------------------------------------------------------------------------|-----------------------|------------------------|------------------------|------------------------|
| q <sub>e</sub> experimental (mg g <sup>-1</sup> )                         | 112.7                 | 175.9                  | 201.5                  | 212.6                  |
| <i>Pseudo first order</i>                                                 |                       |                        |                        |                        |
| q <sub>e</sub> , mg g <sup>-1</sup>                                       | 107.7                 | 167.5                  | 183.1                  | 206.9                  |
| K <sub>1</sub> (min <sup>-1</sup> )                                       | 0.081                 | 0.119                  | 0.126                  | 0.171                  |
| R <sup>2</sup>                                                            | 0.975                 | 0.963                  | 0.948                  | 0.985                  |
| ARE                                                                       | -0.524                | 0.888                  | 9.387                  | -2.535                 |
| SSE                                                                       | 490.3                 | 674.1                  | 3452                   | 572.9                  |
| RMSE                                                                      | 7.002                 | 8.210                  | 18.58                  | 7.569                  |
| HYBRID                                                                    | 0.036                 | -0.061                 | -0.647                 | 0.174                  |
| MPSD                                                                      | 3.339                 | 5.654                  | 59.74                  | 16.13                  |
| Chi square                                                                | 5.325                 | 6.504                  | 21.69                  | 3.713                  |
| <i>Pseudo second order</i>                                                |                       |                        |                        |                        |
| q <sub>e</sub> , mg g <sup>-1</sup>                                       | 116.9                 | 178.54                 | 203.6                  | 217.59                 |
| K <sup>2</sup> (x 10 <sup>-3</sup> g mg <sup>-1</sup> min <sup>-1</sup> ) | 1.01                  | 1.10                   | 1.06                   | 1.48                   |
| R <sup>2</sup>                                                            | 0.998                 | 0.989                  | 0.987                  | 0.996                  |
| ARE                                                                       | -2.770                | 0.113                  | 4.432                  | -2.949                 |
| SSE                                                                       | 817.6                 | 505.3                  | 1492                   | 856.5                  |
| RMSE                                                                      | 9.042                 | 7.108                  | 12.21                  | 9.255                  |
| HYBRID                                                                    | 0.191                 | -0.007                 | -0.305                 | 0.203                  |
| MPSD                                                                      | 17.63                 | 0.719                  | 28.21                  | 18.77                  |
| Chi square                                                                | 9.068                 | 3.726                  | 8.589                  | 5.124                  |

**Table S2.** Isotherm parameters obtained by fitting MB adsorption data for RF/TiO<sub>2</sub> to the Langmuir, Freundlich, SIPS and Toth equations

|                   |                                                |        |
|-------------------|------------------------------------------------|--------|
| <b>Langmuir</b>   | $q_m$ (mg g <sup>-1</sup> )                    | 254.7  |
|                   | $K_L$ (L mg <sup>-1</sup> )                    | 0.073  |
|                   | ARE                                            | -16.69 |
|                   | SSE                                            | 3566   |
|                   | RMSE                                           | 36.64  |
|                   | HYBRID                                         | 19.91  |
|                   | MPSD                                           | -20.87 |
|                   | Chi square                                     | 118.0  |
|                   | R <sup>2</sup>                                 | 0.960  |
| <b>Freundlich</b> | $K_F$ mg g <sup>-1</sup> (L/mg) <sup>1/n</sup> | 54.85  |
|                   | $n_F$                                          | 3.199  |
|                   | ARE                                            | -21.25 |
|                   | SSE                                            | 6149   |
|                   | RMSE                                           | 27.72  |
|                   | HYBRID                                         | -26.56 |
|                   | MPSD                                           | 150.3  |
|                   | Chi square                                     | 86.43  |
|                   | R <sup>2</sup>                                 | 0.865  |
| <b>SIPS</b>       | $q_s$ (mg g <sup>-1</sup> )                    | 218.7  |
|                   | $K_s$                                          | 0.010  |
|                   | $n_s$                                          | 1.913  |
|                   | ARE                                            | -9.675 |
|                   | SSE                                            | 3930   |
|                   | RMSE                                           | 22.17  |
|                   | HYBRID                                         | -12.09 |
|                   | MPSD                                           | 68.41  |
|                   | Chi square                                     | 31.21  |
| <b>Toth</b>       | $q_m$ (mg g <sup>-1</sup> )                    | 558.5  |
|                   | $K_T$                                          | 0.029  |
|                   | $n_T$                                          | 1.403  |
|                   | ARE                                            | -13.83 |
|                   | SSE                                            | 4033   |
|                   | RMSE                                           | 22.45  |
|                   | HYBRID                                         | -17.28 |
|                   | MPSD                                           | 97.76  |
|                   | Chi square                                     | 29.99  |
|                   | R <sup>2</sup>                                 | 0.991  |
